# Supplementary material for: Tunable benzothiadiazole-based donor–acceptor materials for two-photon excited fluorescence
Source: Royal Society of Chemistry journal article supplement (doi:10.1039/c9qm00627c), 2019-12-17
Supplement: c9qm00627c1.pdf [file c9qm00627c1.pdf]

## Supporting Information

Tunable Benzothiadiazole-Based Donor-Acceptor Materials for Two-Photon Excited Fluorescence

By Nathan R. Paisley, Christopher M. Tonge, Don M. Mayder, Kyle A. Thompson, and Zachary M. Hudson\*

Department of Chemistry, The University of British Columbia, 2036 Main Mall, Vancouver, British Columbia, Canada, V6T 1Z1.

Tel: +1-604-822-3266; Fax: +1-604-822-2847; email: zhudson@chem.ubc.ca.

## Additional Figures and Tables

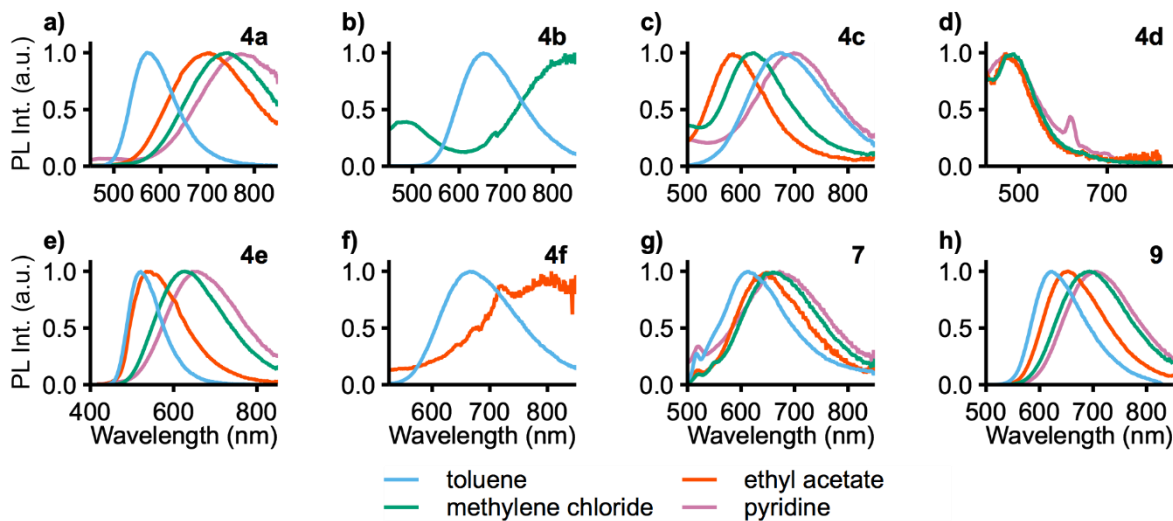

**Figure S1.** Normalized one-photon photoluminescence (PL) of BTD-based D- $\pi$ -A- $\pi$ -D and D-A-D compounds in toluene (blue), methylene chloride (green), ethyl acetate (orange), and pyridine (pink) at  $0.01 \text{ mg mL}^{-1}$ ;  $\lambda_{\text{ex}} = \lambda_{\text{max, abs}}$ . Non-emissive solutions are omitted for clarity.

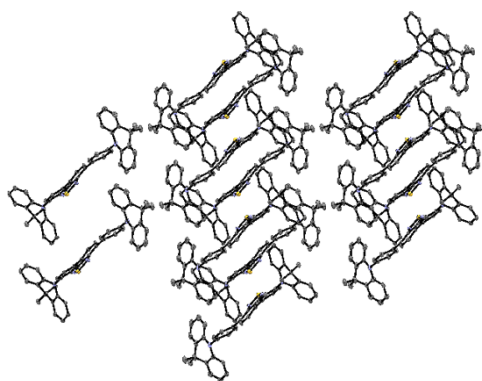

**Figure S2.** Molecular packing of 4a with thermal ellipsoids at the 50% probability level. Hydrogen atoms have been omitted for clarity. Carbon = grey, nitrogen = blue.

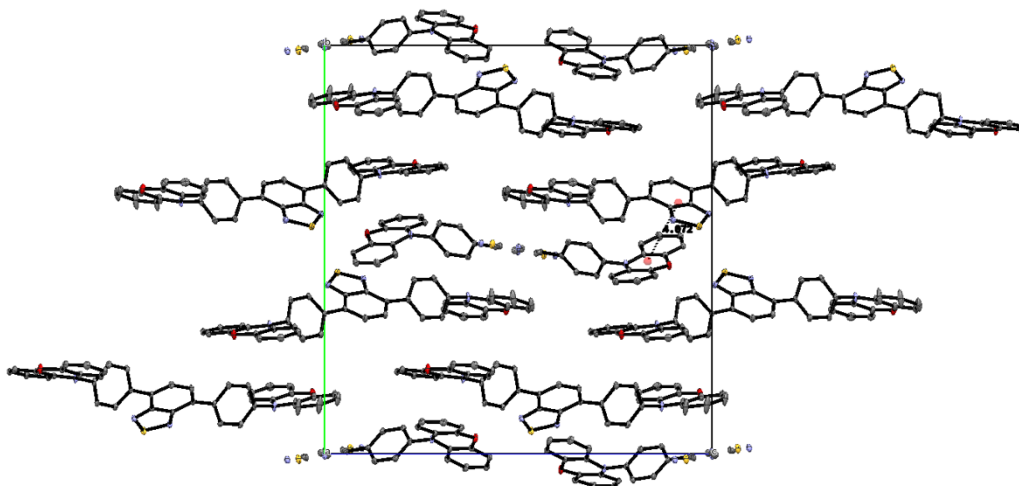

**Figure S3.** Molecular packing of **4b** with thermal ellipsoids at the 50% probability level. Hydrogen atoms have been omitted for clarity. Carbon = grey, nitrogen = blue, oxygen = red.

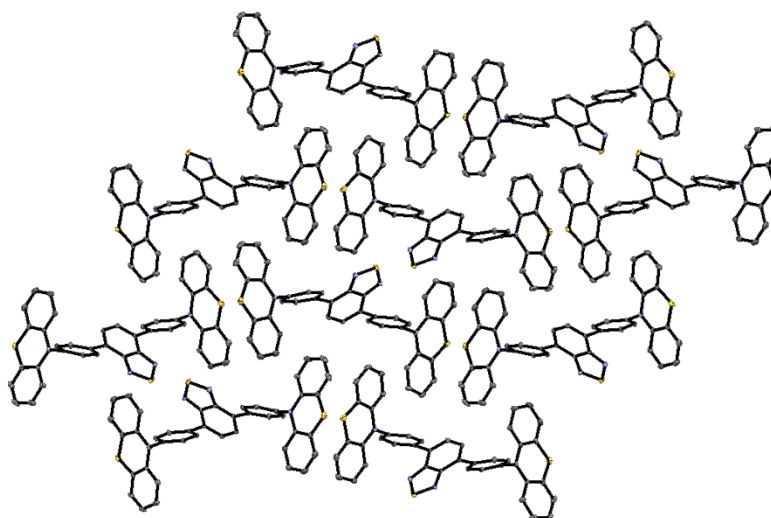

**Figure S4.** Molecular packing of **4c** with thermal ellipsoids at the 50% probability level. Hydrogen atoms have been omitted for clarity. Carbon = grey, nitrogen = blue, sulfur = yellow.

**Table S1.** Results of DFT and TDA-DFT calculations for **4a-f, 7, 9**.

| Cmpd      | $\omega$<br>(Bohr <sup>-1</sup> ) | HOMO <sup>a</sup><br>(eV) | LUMO <sup>a</sup><br>(eV) | E <sub>gap</sub><br>(eV) | Dipole <sup>b</sup><br>(Debye) | E <sub>S1</sub> <sup>c</sup><br>(eV) | f <sup>c</sup> |
|-----------|-----------------------------------|---------------------------|---------------------------|--------------------------|--------------------------------|--------------------------------------|----------------|
| <b>4a</b> | 0.1448                            | -6.58                     | -1.35                     | 5.23                     | 1.12                           | 3.48                                 | 0.0251         |
| <b>4b</b> | 0.1457                            | -6.50                     | -1.43                     | 5.06                     | 0.69                           | 3.37                                 | 0.0001         |
| <b>4c</b> | 0.1490                            | -6.74                     | -1.41                     | 5.33                     | 0.24                           | 3.53                                 | 0.6384         |
| <b>4d</b> | 0.1479                            | -6.09                     | -1.29                     | 4.79                     | 1.51                           | 3.13                                 | 0.0001         |
| <b>4e</b> | 0.1375                            | -6.86                     | -1.67                     | 5.19                     | 0.73                           | 3.37                                 | 0.8772         |
| <b>4f</b> | 0.1343                            | -6.00                     | -1.39                     | 4.60                     | 1.11                           | 3.10                                 | 0.7409         |
| <b>7</b>  | 0.1375                            | -6.11                     | -1.51                     | 4.60                     | 0.77                           | 2.75                                 | 0.0223         |
| <b>9</b>  | 0.1293                            | -6.10                     | -1.13                     | 4.97                     | 1.32                           | 2.73                                 | 0.6843         |

a) Calculated at the  $\omega$ B97XD\*/6-31+G(d) level. b) Ground state dipole calculated at the  $\omega$ B97XD\*/6-31+G(d) level.

c) Calculated using TDA-DFT at the  $\omega$ B97XD\*/6-31+G(d) level in toluene using PCM.

**Table S2.** Crystallography data for solid-state structure of compound **4a**.

|                              |                                                   |
|------------------------------|---------------------------------------------------|
| Formula                      | C <sub>52</sub> H <sub>46</sub> N <sub>4</sub> OS |
| $D_{calc.}/\text{g cm}^{-3}$ | 1.299                                             |
| $\mu/\text{mm}^{-1}$         | 0.128                                             |
| Formula Weight               | 774.99                                            |
| Colour                       | yellow                                            |
| Shape                        | plate                                             |
| Size/ $\text{mm}^3$          | 0.40×0.30×0.03                                    |
| $T/\text{K}$                 | 90(2)                                             |
| Crystal System               | triclinic                                         |
| Space Group                  | <i>P</i> -1                                       |
| $a/\text{Å}$                 | 9.1767(11)                                        |
| $b/\text{Å}$                 | 12.3849(14)                                       |
| $c/\text{Å}$                 | 18.948(2)                                         |
| $\alpha/^\circ$              | 84.388(4)                                         |
| $\beta/^\circ$               | 80.102(4)                                         |
| $\gamma/^\circ$              | 69.216(4)                                         |
| $V/\text{Å}^3$               | 1981.7(4)                                         |
| $Z$                          | 2                                                 |
| $Z'$                         | 1                                                 |
| Wavelength/Å                 | 0.71073                                           |
| Radiation type               | MoK $\alpha$                                      |
| $\Theta_{min}/^\circ$        | 1.092                                             |
| $\Theta_{max}/^\circ$        | 22.656                                            |
| Measured Refl.               | 17258                                             |
| Independent Refl.            | 5187                                              |
| Reflections with $I > 2(I)$  | 3422                                              |
| $R_{int}$                    | 0.0716                                            |
| Parameters                   | 558                                               |
| Restraints                   | 195                                               |
| Largest Peak                 | 0.412                                             |
| Deepest Hole                 | -0.326                                            |
| GooF                         | 1.097                                             |
| $wR_2$ (all data)            | 0.1881                                            |
| $wR_2$                       | 0.1733                                            |
| $R_1$ (all data)             | 0.1290                                            |
| $R_1$                        | 0.0850                                            |

**Table S3.** Crystallography data for solid-state structure of compound **4b**.

|                              |                                                                                  |
|------------------------------|----------------------------------------------------------------------------------|
| Formula                      | C <sub>69</sub> H <sub>44</sub> ClN <sub>6</sub> O <sub>3</sub> S <sub>1.5</sub> |
| $D_{calc.}/\text{g cm}^{-3}$ | 1.410                                                                            |
| $\mu/\text{mm}^{-1}$         | 0.196                                                                            |
| Formula Weight               | 1088.64                                                                          |
| Colour                       | orange                                                                           |
| Shape                        | prism                                                                            |
| Size/mm <sup>3</sup>         | 0.28×0.26×0.14                                                                   |
| $T/\text{K}$                 | 90(2)                                                                            |
| Crystal System               | monoclinic                                                                       |
| Space Group                  | $P2_1/n$                                                                         |
| $a/\text{Å}$                 | 9.0449(6)                                                                        |
| $b/\text{Å}$                 | 24.4570(16)                                                                      |
| $c/\text{Å}$                 | 23.2721(14)                                                                      |
| $\alpha/^\circ$              | 90                                                                               |
| $\beta/^\circ$               | 95.117(2)                                                                        |
| $\gamma/^\circ$              | 90                                                                               |
| $V/\text{Å}^3$               | 5127.5(6)                                                                        |
| $Z$                          | 4                                                                                |
| $Z'$                         | 1                                                                                |
| Wavelength/Å                 | 0.71073                                                                          |
| Radiation type               | MoK $\alpha$                                                                     |
| $\Theta_{min}/^\circ$        | 1.665                                                                            |
| $\Theta_{max}/^\circ$        | 30.547                                                                           |
| Measured Refl.               | 80125                                                                            |
| Independent Refl.            | 15663                                                                            |
| Reflections with $I > 2(I)$  | 11562                                                                            |
| $R_{int}$                    | 0.0498                                                                           |
| Parameters                   | 806                                                                              |
| Restraints                   | 570                                                                              |
| Largest Peak                 | 0.449                                                                            |
| Deepest Hole                 | -0.529                                                                           |
| GooF                         | 1.023                                                                            |
| $wR_2$ (all data)            | 0.1201                                                                           |
| $wR_2$                       | 0.1076                                                                           |
| $R_1$ (all data)             | 0.0716                                                                           |
| $R_1$                        | 0.0464                                                                           |

**Table S4.** Crystallography data for solid-state structure of compound **4c**.

|                                                |                                                               |
|------------------------------------------------|---------------------------------------------------------------|
| Formula                                        | C <sub>42</sub> H <sub>26</sub> N <sub>4</sub> S <sub>3</sub> |
| <i>D</i> <sub>calc.</sub> / g cm <sup>-3</sup> | 1.411                                                         |
| $\mu$ /mm <sup>-1</sup>                        | 0.270                                                         |
| Formula Weight                                 | 682.85                                                        |
| Colour                                         | red                                                           |
| Shape                                          | needle                                                        |
| Size/mm <sup>3</sup>                           | 0.54×0.11×0.06                                                |
| <i>T</i> /K                                    | 100(2)                                                        |
| Crystal System                                 | monoclinic                                                    |
| Space Group                                    | <i>P</i> 2 <sub>1</sub> / <i>n</i>                            |
| <i>a</i> /Å                                    | 7.1069(5)                                                     |
| <i>b</i> /Å                                    | 29.8434(19)                                                   |
| <i>c</i> /Å                                    | 15.2458(10)                                                   |
| $\alpha$ /°                                    | 90                                                            |
| $\beta$ /°                                     | 96.180(2)                                                     |
| $\gamma$ /°                                    | 90                                                            |
| <i>V</i> /Å <sup>3</sup>                       | 3214.8(4)                                                     |
| <i>Z</i>                                       | 4                                                             |
| <i>Z</i> '                                     | 1                                                             |
| Wavelength/Å                                   | 0.71073                                                       |
| Radiation type                                 | MoK $\alpha$                                                  |
| $\Theta$ <sub>min</sub> /°                     | 1.915                                                         |
| $\Theta$ <sub>max</sub> /°                     | 30.550                                                        |
| Measured Refl.                                 | 44276                                                         |
| Independent Refl.                              | 9823                                                          |
| Reflections with <i>I</i> > 2( <i>I</i> )      | 7248                                                          |
| <i>R</i> <sub>int</sub>                        | 0.0587                                                        |
| Parameters                                     | 442                                                           |
| Restraints                                     | 0                                                             |
| Largest Peak                                   | 0.456                                                         |
| Deepest Hole                                   | -0.412                                                        |
| GooF                                           | 1.021                                                         |
| <i>wR</i> <sub>2</sub> (all data)              | 0.1097                                                        |
| <i>wR</i> <sub>2</sub>                         | 0.0988                                                        |
| <i>R</i> <sub>1</sub> (all data)               | 0.0725                                                        |
| <i>R</i> <sub>1</sub>                          | 0.0455                                                        |

**Table S5.** Cartesian coordinates (Å) for the optimized ground-state structure of **4a**.

| Atom | x         | y         | z         |
|------|-----------|-----------|-----------|
| C    | 1.464927  | -0.041500 | -0.015075 |
| C    | 0.724149  | 1.188027  | -0.010582 |
| C    | 0.712466  | -1.193138 | -0.008364 |
| C    | -0.724151 | 1.188026  | 0.010580  |
| C    | -0.712464 | -1.193139 | 0.008353  |
| H    | 1.220322  | -2.153485 | -0.030343 |
| C    | -1.464926 | -0.041502 | 0.015068  |
| H    | -1.220318 | -2.153487 | 0.030328  |
| N    | 1.249321  | 2.419274  | -0.012716 |
| N    | -1.249325 | 2.419271  | 0.012719  |
| S    | -0.000003 | 3.461689  | 0.000003  |
| C    | -2.946240 | -0.073462 | 0.012090  |
| C    | -3.625405 | -0.979067 | -0.816494 |
| C    | -3.697804 | 0.773263  | 0.840516  |
| C    | -5.015922 | -1.043853 | -0.813942 |
| H    | -3.061214 | -1.620080 | -1.488465 |
| C    | -5.087519 | 0.705717  | 0.846854  |
| H    | -3.193196 | 1.483839  | 1.485719  |
| C    | -5.750604 | -0.200887 | 0.019282  |
| H    | -5.541163 | -1.737680 | -1.463570 |
| H    | -5.669877 | 1.357007  | 1.491779  |
| C    | 2.946241  | -0.073457 | -0.012097 |
| C    | 3.697803  | 0.773272  | -0.840520 |
| C    | 3.625407  | -0.979064 | 0.816484  |
| C    | 5.087518  | 0.705729  | -0.846858 |
| H    | 3.193194  | 1.483850  | -1.485720 |
| C    | 5.015924  | -1.043848 | 0.813931  |
| H    | 3.061217  | -1.620080 | 1.488453  |
| C    | 5.750604  | -0.200877 | -0.019290 |
| H    | 5.669876  | 1.357022  | -1.491781 |
| H    | 5.541166  | -1.737675 | 1.463557  |
| C    | -7.891384 | 0.563327  | -0.869851 |
| C    | -7.828957 | -1.134269 | 0.898280  |
| C    | -7.193020 | 1.429913  | -1.731875 |
| C    | -9.297228 | 0.529319  | -0.906582 |



|   |            |           |           |
|---|------------|-----------|-----------|
| C | -9.233121  | -1.221738 | 0.917075  |
| C | -7.070411  | -1.934077 | 1.774028  |
| C | -7.872681  | 2.253000  | -2.619952 |
| H | -6.109906  | 1.460414  | -1.705581 |
| C | -9.949661  | 1.371984  | -1.813950 |
| C | -9.822108  | -2.115557 | 1.818708  |
| H | -5.988606  | -1.868409 | 1.764547  |
| C | -7.688098  | -2.810544 | 2.656351  |
| C | -9.264724  | 2.229886  | -2.668160 |
| H | -7.307262  | 2.911985  | -3.272686 |
| H | -11.035318 | 1.358782  | -1.856205 |
| C | -9.077333  | -2.908848 | 2.685301  |
| H | -10.905313 | -2.196247 | 1.846417  |
| H | -7.076940  | -3.414880 | 3.320727  |
| H | -9.809906  | 2.867593  | -3.357195 |
| H | -9.574582  | -3.589440 | 3.369511  |
| C | 7.828958   | -1.134255 | -0.898290 |
| C | 7.891383   | 0.563330  | 0.869851  |
| C | 7.070414   | -1.934050 | -1.774051 |
| C | 9.233122   | -1.221733 | -0.917075 |
| C | 9.297227   | 0.529312  | 0.906593  |
| C | 7.193019   | 1.429918  | 1.731872  |
| C | 7.688102   | -2.810514 | -2.656376 |
| H | 5.988610   | -1.868376 | -1.764577 |
| C | 9.822110   | -2.115549 | -1.818712 |
| C | 9.949659   | 1.371968  | 1.813970  |
| H | 6.109906   | 1.460428  | 1.705569  |
| C | 7.872679   | 2.252997  | 2.619958  |
| C | 9.077337   | -2.908828 | -2.685316 |
| H | 7.076945   | -3.414841 | -3.320762 |
| H | 10.905314  | -2.196247 | -1.846412 |
| C | 9.264721   | 2.229872  | 2.668178  |
| H | 11.035315  | 1.358757  | 1.856234  |
| H | 7.307260   | 2.911984  | 3.272690  |
| H | 9.574586   | -3.589418 | -3.369528 |
| H | 9.809903   | 2.867573  | 3.357220  |
| N | 7.178804   | -0.258249 | -0.016906 |

|   |            |           |           |
|---|------------|-----------|-----------|
| N | -7.178803  | -0.258260 | 0.016898  |
| C | -10.126659 | -0.384581 | -0.001396 |
| C | 10.126658  | -0.384592 | 0.001412  |
| C | 10.971385  | -1.335795 | 0.884702  |
| H | 11.593099  | -1.996250 | 0.271205  |
| H | 11.639013  | -0.772603 | 1.545128  |
| H | 10.321378  | -1.959231 | 1.507038  |
| C | 11.065603  | 0.487118  | -0.868821 |
| H | 11.734276  | 1.090401  | -0.245964 |
| H | 11.690503  | -0.133560 | -1.519461 |
| H | 10.482731  | 1.165215  | -1.500393 |
| C | -10.971408 | -1.335767 | -0.884681 |
| H | -11.593124 | -1.996219 | -0.271180 |
| H | -11.639038 | -0.772564 | -1.545095 |
| H | -10.321418 | -1.959208 | -1.507029 |
| C | -11.065582 | 0.487136  | 0.868855  |
| H | -11.690480 | -0.133540 | 1.519500  |
| H | -10.482692 | 1.165222  | 1.500423  |
| H | -11.734255 | 1.090431  | 0.246009  |

**Table S6.** Cartesian coordinates (Å) for the optimized ground-state structure of **4b**.

| Atom | x         | y         | z         |
|------|-----------|-----------|-----------|
| C    | 1.464357  | 0.212789  | 0.027724  |
| C    | 0.724047  | -1.016818 | 0.010384  |
| C    | 0.712391  | 1.364560  | 0.012495  |
| C    | -0.724047 | -1.016818 | -0.010383 |
| C    | -0.712391 | 1.364560  | -0.012494 |
| H    | 1.220648  | 2.324893  | 0.005298  |
| C    | -1.464357 | 0.212789  | -0.027724 |
| H    | -1.220648 | 2.324893  | -0.005298 |
| N    | 1.248981  | -2.248015 | 0.023442  |
| N    | -1.248980 | -2.248015 | -0.023441 |
| S    | 0.000000  | -3.290460 | 0.000001  |
| C    | -2.945012 | 0.245397  | -0.073495 |
| C    | -3.598972 | 1.151400  | -0.920309 |
| C    | -3.720210 | -0.601290 | 0.734170  |
| C    | -4.989917 | 1.219383  | -0.955865 |

|   |            |           |           |
|---|------------|-----------|-----------|
| H | -3.015522  | 1.791491  | -1.576398 |
| C | -5.108603  | -0.531299 | 0.702933  |
| H | -3.234177  | -1.312724 | 1.392539  |
| C | -5.747177  | 0.378674  | -0.142942 |
| H | -5.497122  | 1.914135  | -1.618343 |
| H | -5.708154  | -1.182002 | 1.332909  |
| C | 2.945012   | 0.245397  | 0.073497  |
| C | 3.598972   | 1.151401  | 0.920310  |
| C | 3.720210   | -0.601289 | -0.734169 |
| C | 4.989916   | 1.219383  | 0.955866  |
| H | 3.015521   | 1.791491  | 1.576399  |
| C | 5.108603   | -0.531299 | -0.702931 |
| H | 3.234178   | -1.312724 | -1.392538 |
| C | 5.747177   | 0.378675  | 0.142944  |
| H | 5.497122   | 1.914136  | 1.618344  |
| H | 5.708154   | -1.182001 | -1.332908 |
| C | -7.860106  | 1.166572  | 0.810390  |
| C | -7.888371  | -0.510365 | -0.929845 |
| C | -7.208453  | 1.924785  | 1.786116  |
| C | -9.264002  | 1.138556  | 0.816469  |
| C | -9.291336  | -0.494688 | -0.878455 |
| C | -7.265187  | -1.466429 | -1.735518 |
| C | -7.940093  | 2.638878  | 2.738652  |
| H | -6.124365  | 1.963738  | 1.796964  |
| C | -9.991693  | 1.835905  | 1.767439  |
| C | -10.046255 | -1.407156 | -1.597953 |
| H | -6.182269  | -1.493423 | -1.794060 |
| C | -8.024340  | -2.379729 | -2.471690 |
| C | -9.330175  | 2.596554  | 2.735162  |
| H | -7.409849  | 3.225560  | 3.482609  |
| H | -11.075057 | 1.780942  | 1.731139  |
| C | -9.413308  | -2.355992 | -2.405200 |
| H | -11.127826 | -1.355656 | -1.523273 |
| H | -7.515981  | -3.109077 | -3.094885 |
| H | -9.903504  | 3.147560  | 3.473828  |
| H | -10.007739 | -3.064334 | -2.973431 |
| C | 7.888371   | -0.510364 | 0.929845  |

|   |           |           |           |
|---|-----------|-----------|-----------|
| C | 7.860105  | 1.166573  | -0.810391 |
| C | 7.265188  | -1.466428 | 1.735518  |
| C | 9.291337  | -0.494687 | 0.878454  |
| C | 9.264002  | 1.138556  | -0.816470 |
| C | 7.208452  | 1.924785  | -1.786116 |
| C | 8.024342  | -2.379728 | 2.471690  |
| H | 6.182270  | -1.493422 | 1.794062  |
| C | 10.046256 | -1.407155 | 1.597951  |
| C | 9.991692  | 1.835904  | -1.767442 |
| H | 6.124364  | 1.963737  | -1.796964 |
| C | 7.940091  | 2.638876  | -2.738654 |
| C | 9.413310  | -2.355991 | 2.405199  |
| H | 7.515983  | -3.109076 | 3.094886  |
| H | 11.127826 | -1.355655 | 1.523271  |
| C | 9.330173  | 2.596552  | -2.735166 |
| H | 11.075056 | 1.780940  | -1.731142 |
| H | 7.409847  | 3.225557  | -3.482611 |
| H | 10.007741 | -3.064334 | 2.973429  |
| H | 9.903502  | 3.147556  | -3.473832 |
| N | 7.173177  | 0.450085  | 0.188222  |
| N | -7.173177 | 0.450083  | -0.188221 |
| O | -9.971424 | 0.452495  | -0.145338 |
| O | 9.971424  | 0.452496  | 0.145337  |

**Table S7.** Cartesian coordinates (Å) for the optimized ground-state structure of **4c**.

| Atom | x         | y         | z         |
|------|-----------|-----------|-----------|
| C    | 1.464644  | 0.122877  | 0.003935  |
| C    | 0.724087  | -1.106756 | -0.001050 |
| C    | 0.712506  | 1.274374  | 0.000592  |
| C    | -0.724087 | -1.106756 | 0.001050  |
| C    | -0.712506 | 1.274374  | -0.000625 |
| H    | 1.220518  | 2.234729  | -0.015471 |
| C    | -1.464644 | 0.122877  | -0.003951 |
| H    | -1.220518 | 2.234729  | 0.015425  |
| N    | 1.248999  | -2.337930 | 0.003790  |
| N    | -1.248999 | -2.337929 | -0.003775 |
| S    | 0.000000  | -3.380296 | 0.000013  |

|   |            |           |           |
|---|------------|-----------|-----------|
| C | -2.945668  | 0.155993  | -0.024924 |
| C | -3.614305  | 1.065689  | -0.855463 |
| C | -3.707875  | -0.693530 | 0.791687  |
| C | -5.005434  | 1.135353  | -0.865809 |
| H | -3.042501  | 1.708749  | -1.518896 |
| C | -5.096360  | -0.622302 | 0.784281  |
| H | -3.211897  | -1.408791 | 1.438469  |
| C | -5.750976  | 0.292701  | -0.044976 |
| H | -5.523913  | 1.833858  | -1.515360 |
| H | -5.683094  | -1.277226 | 1.422376  |
| C | 2.945668   | 0.155994  | 0.024910  |
| C | 3.614301   | 1.065700  | 0.855442  |
| C | 3.707878   | -0.693535 | -0.791690 |
| C | 5.005430   | 1.135367  | 0.865790  |
| H | 3.042494   | 1.708766  | 1.518867  |
| C | 5.096364   | -0.622305 | -0.784280 |
| H | 3.211904   | -1.408802 | -1.438468 |
| C | 5.750976   | 0.292708  | 0.044968  |
| H | 5.523906   | 1.833880  | 1.515335  |
| H | 5.683100   | -1.277236 | -1.422365 |
| C | -7.825701  | 1.099400  | 0.958232  |
| C | -7.886830  | -0.581617 | -0.842165 |
| C | -7.143352  | 1.499186  | 2.115771  |
| C | -9.182381  | 1.447736  | 0.834192  |
| C | -9.249096  | -0.387713 | -1.131519 |
| C | -7.260496  | -1.730842 | -1.344492 |
| C | -7.797888  | 2.210994  | 3.120073  |
| H | -6.091156  | 1.267531  | 2.232039  |
| C | -9.840882  | 2.121810  | 1.861482  |
| C | -9.967359  | -1.343156 | -1.848833 |
| H | -6.205739  | -1.899036 | -1.161449 |
| C | -7.975368  | -2.660719 | -2.098158 |
| C | -9.151090  | 2.516690  | 3.006564  |
| H | -7.238881  | 2.515872  | 3.999910  |
| H | -10.895729 | 2.355344  | 1.747335  |
| C | -9.333325  | -2.480884 | -2.345327 |
| H | -11.024765 | -1.177597 | -2.035199 |

|   |            |           |           |
|---|------------|-----------|-----------|
| H | -7.459051  | -3.535339 | -2.482776 |
| H | -9.666365  | 3.058392  | 3.793498  |
| H | -9.894997  | -3.210696 | -2.919900 |
| C | 7.886822   | -0.581588 | 0.842194  |
| C | 7.825708   | 1.099370  | -0.958258 |
| C | 7.260481   | -1.730795 | 1.344553  |
| C | 9.249087   | -0.387680 | 1.131550  |
| C | 9.182390   | 1.447701  | -0.834223 |
| C | 7.143366   | 1.499125  | -2.115811 |
| C | 7.975345   | -2.660650 | 2.098253  |
| H | 6.205726   | -1.898992 | 1.161505  |
| C | 9.967342   | -1.343103 | 1.848900  |
| C | 9.840901   | 2.121735  | -1.861534 |
| H | 6.091168   | 1.267476  | -2.232075 |
| C | 7.797912   | 2.210894  | -3.120135 |
| C | 9.333300   | -2.480812 | 2.345427  |
| H | 7.459022   | -3.535257 | 2.482896  |
| H | 11.024747  | -1.177541 | 2.035268  |
| C | 9.151116   | 2.516582  | -3.006632 |
| H | 10.895749  | 2.355265  | -1.747390 |
| H | 7.238910   | 2.515748  | -3.999984 |
| H | 9.894966   | -3.210607 | 2.920028  |
| H | 9.666399   | 3.058252  | -3.793582 |
| N | 7.180751   | 0.381463  | 0.078945  |
| N | -7.180752  | 0.381455  | -0.078949 |
| S | -10.033052 | 1.141272  | -0.691652 |
| S | 10.033052  | 1.141286  | 0.691635  |

**Table S8.** Cartesian coordinates (Å) for the optimized ground-state structure of **4d**.

| Atom | x         | y         | z         |
|------|-----------|-----------|-----------|
| C    | -1.464781 | -0.180766 | -0.021317 |
| C    | -0.724150 | 1.048799  | -0.007438 |
| C    | -0.712472 | -1.332184 | -0.009167 |
| C    | 0.724150  | 1.048799  | 0.007438  |
| C    | 0.712472  | -1.332184 | 0.009167  |
| H    | -1.220858 | -2.292459 | 0.000581  |
| C    | 1.464781  | -0.180765 | 0.021317  |

|   |           |           |           |
|---|-----------|-----------|-----------|
| H | 1.220858  | -2.292459 | -0.000581 |
| N | -1.249073 | 2.279933  | -0.018441 |
| N | 1.249073  | 2.279933  | 0.018441  |
| S | 0.000000  | 3.322283  | 0.000000  |
| C | 2.945508  | -0.213856 | 0.060447  |
| C | 3.603329  | -1.120314 | 0.903163  |
| C | 3.717749  | 0.632344  | -0.750606 |
| C | 4.994498  | -1.189554 | 0.931212  |
| H | 3.022738  | -1.760357 | 1.561959  |
| C | 5.105908  | 0.560699  | -0.726400 |
| H | 3.229129  | 1.344710  | -1.406199 |
| C | 5.749442  | -0.350383 | 0.115599  |
| H | 5.505127  | -1.884917 | 1.590309  |
| H | 5.702040  | 1.211484  | -1.359691 |
| C | -2.945507 | -0.213856 | -0.060446 |
| C | -3.717749 | 0.632344  | 0.750606  |
| C | -3.603329 | -1.120315 | -0.903162 |
| C | -5.105908 | 0.560699  | 0.726400  |
| H | -3.229129 | 1.344710  | 1.406198  |
| C | -4.994498 | -1.189555 | -0.931211 |
| H | -3.022738 | -1.760357 | -1.561958 |
| C | -5.749442 | -0.350383 | -0.115599 |
| H | -5.702040 | 1.211485  | 1.359691  |
| H | -5.505127 | -1.884917 | -1.590309 |
| C | 7.886326  | 0.566581  | 0.866352  |
| C | 7.845054  | -1.107376 | -0.886194 |
| C | 7.256130  | 1.620985  | 1.523211  |
| C | 9.292389  | 0.447506  | 0.931124  |
| C | 9.251731  | -1.210794 | -0.804969 |
| C | 7.174615  | -1.698955 | -1.954345 |
| C | 8.003750  | 2.566402  | 2.234722  |
| H | 6.175128  | 1.702375  | 1.497469  |
| C | 10.029033 | 1.420007  | 1.606034  |
| C | 9.948178  | -1.857614 | -1.825101 |
| H | 6.093012  | -1.642691 | -2.007574 |
| C | 7.881715  | -2.383906 | -2.949350 |
| C | 9.386854  | 2.472924  | 2.268534  |

|   |            |           |           |
|---|------------|-----------|-----------|
| H | 7.490152   | 3.372018  | 2.750437  |
| H | 11.111801  | 1.361817  | 1.628262  |
| C | 9.265287   | -2.455353 | -2.891157 |
| H | 11.031111  | -1.908263 | -1.794636 |
| H | 7.337016   | -2.849174 | -3.765257 |
| H | 9.979388   | 3.208570  | 2.803889  |
| H | 9.826949   | -2.970183 | -3.664681 |
| C | -7.845054  | -1.107376 | 0.886194  |
| C | -7.886326  | 0.566581  | -0.866352 |
| C | -7.174616  | -1.698955 | 1.954345  |
| C | -9.251731  | -1.210794 | 0.804969  |
| C | -9.292389  | 0.447506  | -0.931124 |
| C | -7.256130  | 1.620985  | -1.523211 |
| C | -7.881716  | -2.383907 | 2.949350  |
| H | -6.093012  | -1.642692 | 2.007575  |
| C | -9.948178  | -1.857614 | 1.825101  |
| C | -10.029032 | 1.420007  | -1.606034 |
| H | -6.175127  | 1.702375  | -1.497469 |
| C | -8.003749  | 2.566402  | -2.234722 |
| C | -9.265288  | -2.455353 | 2.891156  |
| H | -7.337016  | -2.849174 | 3.765257  |
| H | -11.031112 | -1.908263 | 1.794635  |
| C | -9.386854  | 2.472924  | -2.268535 |
| H | -11.111801 | 1.361817  | -1.628262 |
| H | -7.490152  | 3.372018  | -2.750437 |
| H | -9.826950  | -2.970183 | 3.664680  |
| H | -9.979387  | 3.208570  | -2.803890 |
| N | -7.176199  | -0.431632 | -0.159879 |
| N | 7.176199   | -0.431631 | 0.159879  |
| N | 9.879589   | -0.684300 | 0.337665  |
| N | -9.879589  | -0.684300 | -0.337666 |
| C | 11.273845  | -0.973114 | 0.580771  |
| H | 11.463842  | -2.027211 | 0.363235  |
| H | 11.958766  | -0.357522 | -0.024570 |
| H | 11.494162  | -0.806943 | 1.638288  |
| C | -11.273845 | -0.973114 | -0.580771 |
| H | -11.463842 | -2.027210 | -0.363235 |



|   |            |           |           |
|---|------------|-----------|-----------|
| H | -11.958766 | -0.357521 | 0.024570  |
| H | -11.494162 | -0.806943 | -1.638288 |

**Table S9.** Cartesian coordinates (Å) for the optimized ground-state structure of **4e**.

| Atom | x         | y         | z         |
|------|-----------|-----------|-----------|
| C    | 1.465438  | -0.147619 | -0.002010 |
| C    | 0.724386  | -1.377252 | 0.001437  |
| C    | 0.712234  | 1.004460  | 0.000556  |
| C    | -0.724375 | -1.377257 | -0.002278 |
| C    | -0.712240 | 1.004455  | -0.001401 |
| H    | 1.218916  | 1.965355  | 0.019114  |
| C    | -1.465436 | -0.147629 | 0.001177  |
| H    | -1.218929 | 1.965346  | -0.019953 |
| N    | 1.249246  | -2.608914 | -0.003046 |
| N    | -1.249225 | -2.608924 | 0.002202  |
| S    | 0.000014  | -3.651909 | -0.000424 |
| C    | -2.945991 | -0.115125 | 0.021776  |
| C    | -3.616766 | 0.810310  | 0.835690  |
| C    | -3.709854 | -0.981803 | -0.774484 |
| C    | -5.006776 | 0.871110  | 0.858130  |
| H    | -3.046414 | 1.464387  | 1.489264  |
| C    | -5.098872 | -0.911473 | -0.771803 |
| H    | -3.215472 | -1.704176 | -1.413846 |
| C    | -5.751991 | 0.011188  | 0.048797  |
| H    | -5.518460 | 1.568678  | 1.514336  |
| H    | -5.683088 | -1.567424 | -1.410096 |
| C    | 2.945993  | -0.115104 | -0.022557 |
| C    | 3.709826  | -0.981776 | 0.773739  |
| C    | 3.616798  | 0.810343  | -0.836432 |
| C    | 5.098843  | -0.911422 | 0.771138  |
| H    | 3.215419  | -1.704160 | 1.413067  |
| C    | 5.006810  | 0.871166  | -0.858793 |
| H    | 3.046472  | 1.464416  | -1.490033 |
| C    | 5.751992  | 0.011257  | -0.049418 |
| H    | 5.683032  | -1.567366 | 1.409462  |
| H    | 5.518520  | 1.568746  | -1.514966 |
| C    | -8.017555 | -0.977409 | 0.425905  |

|   |            |           |           |
|---|------------|-----------|-----------|
| C | -7.946310  | 1.166644  | -0.283592 |
| C | -7.697943  | -2.262343 | 0.871760  |
| C | -9.358256  | -0.544581 | 0.306707  |
| C | -9.312750  | 0.828282  | -0.149228 |
| C | -7.543462  | 2.425307  | -0.736982 |
| C | -8.748623  | -3.119664 | 1.173889  |
| H | -6.667593  | -2.587564 | 0.973472  |
| C | -10.400514 | -1.412807 | 0.638526  |
| C | -10.295136 | 1.774060  | -0.449914 |
| H | -6.494265  | 2.674291  | -0.859263 |
| C | -8.535578  | 3.345574  | -1.052212 |
| C | -10.088166 | -2.701370 | 1.062013  |
| H | -8.544701  | -4.133406 | 1.504770  |
| H | -11.438836 | -1.101099 | 0.576065  |
| C | -9.899061  | 3.028631  | -0.904271 |
| H | -11.351523 | 1.547580  | -0.340477 |
| H | -8.266758  | 4.328674  | -1.426433 |
| C | 7.946251   | 1.166755  | 0.283212  |
| C | 8.017618   | -0.977296 | -0.426280 |
| C | 7.543327   | 2.425411  | 0.736556  |
| C | 9.312714   | 0.828400  | 0.149063  |
| C | 9.358299   | -0.544463 | -0.306867 |
| C | 7.698084   | -2.262235 | -0.872176 |
| C | 8.535390   | 3.345676  | 1.051959  |
| H | 6.494110   | 2.674390  | 0.858674  |
| C | 10.295049  | 1.774176  | 0.449920  |
| C | 10.400613  | -1.412691 | -0.638501 |
| H | 6.667751   | -2.587460 | -0.974053 |
| C | 8.748816   | -3.119558 | -1.174118 |
| C | 9.898897   | 3.028738  | 0.904234  |
| H | 8.266507   | 4.328769  | 1.426153  |
| H | 11.351454  | 1.547699  | 0.340652  |
| C | 10.088339  | -2.701262 | -1.062018 |
| H | 11.438925  | -1.100982 | -0.575865 |
| H | 8.544951   | -4.133306 | -1.505016 |
| N | 7.169401   | 0.066752  | -0.067683 |
| N | -7.169400  | 0.066642  | 0.067167  |

|   |           |           |           |
|---|-----------|-----------|-----------|
| C | 11.083105 | 5.211339  | 0.587610  |
| C | 11.793595 | 3.900185  | 2.285637  |
| C | 10.420009 | 5.734057  | -0.525364 |
| C | 12.141560 | 5.904808  | 1.220425  |
| C | 11.953554 | 2.874892  | 3.220916  |
| C | 12.597918 | 5.063646  | 2.307943  |
| C | 10.830131 | 6.979729  | -0.991897 |
| H | 9.618496  | 5.186417  | -1.011778 |
| C | 12.534568 | 7.154862  | 0.731695  |
| C | 12.949041 | 3.029773  | 4.181225  |
| H | 11.322787 | 1.991406  | 3.201646  |
| C | 13.591686 | 5.194695  | 3.283439  |
| C | 11.874327 | 7.687560  | -0.371196 |
| H | 10.333298 | 7.411059  | -1.856312 |
| H | 13.345747 | 7.700964  | 1.205204  |
| C | 13.763867 | 4.175051  | 4.214312  |
| H | 13.096953 | 2.248086  | 4.920884  |
| H | 14.219175 | 6.081112  | 3.314568  |
| H | 12.169261 | 8.657315  | -0.760708 |
| H | 14.532685 | 4.263340  | 4.976008  |
| N | 10.880146 | 3.999109  | 1.239888  |
| C | 12.078036 | -4.110699 | -0.498369 |
| C | 11.373216 | -4.151311 | -2.645363 |
| C | 12.220018 | -3.865021 | 0.869534  |
| C | 12.943210 | -4.988293 | -1.193016 |
| C | 10.697206 | -3.924035 | -3.846638 |
| C | 12.490656 | -5.015414 | -2.568862 |
| C | 13.259168 | -4.509476 | 1.534495  |
| H | 11.543353 | -3.198397 | 1.395399  |
| C | 13.979737 | -5.623567 | -0.501406 |
| C | 11.154930 | -4.592307 | -4.978552 |
| H | 9.849690  | -3.247262 | -3.896953 |
| C | 12.930828 | -5.674717 | -3.721149 |
| C | 14.134066 | -5.378648 | 0.859490  |
| H | 13.394425 | -4.336389 | 2.598342  |
| H | 14.653793 | -6.299974 | -1.019639 |
| C | 12.258170 | -5.461822 | -4.920429 |

|   |            |           |           |
|---|------------|-----------|-----------|
| H | 10.648922  | -4.434854 | -5.926826 |
| H | 13.787592  | -6.341611 | -3.680634 |
| H | 14.935666  | -5.863934 | 1.408153  |
| H | 12.589088  | -5.967837 | -5.822406 |
| C | -11.083210 | 5.211225  | -0.587403 |
| C | -11.793995 | 3.900107  | -2.285334 |
| C | -10.419918 | 5.733916  | 0.525466  |
| C | -12.141774 | 5.904709  | -1.220020 |
| C | -11.954112 | 2.874833  | -3.220605 |
| C | -12.598320 | 5.063570  | -2.307478 |
| C | -10.829953 | 6.979580  | 0.992097  |
| H | -9.618321  | 5.186263  | 1.011727  |
| C | -12.534692 | 7.154755  | -0.731194 |
| C | -12.949762 | 3.029734  | -4.180742 |
| H | -11.323342 | 1.991346  | -3.201459 |
| C | -13.592252 | 5.194640  | -3.282803 |
| C | -11.874256 | 7.687427  | 0.371593  |
| H | -10.332967 | 7.410891  | 1.856434  |
| H | -13.345952 | 7.700869  | -1.204548 |
| C | -13.764592 | 4.175014  | -4.213668 |
| H | -13.097800 | 2.248062  | -4.920392 |
| H | -14.219746 | 6.081058  | -3.313809 |
| H | -12.169118 | 8.657174  | 0.761177  |
| H | -14.533537 | 4.263320  | -4.975234 |
| C | -12.077994 | -4.110801 | 0.498791  |
| C | -11.372753 | -4.151353 | 2.645648  |
| C | -12.220243 | -3.865170 | -0.869092 |
| C | -12.943054 | -4.988347 | 1.193642  |
| C | -10.696503 | -3.924045 | 3.846783  |
| C | -12.490231 | -5.015429 | 2.569400  |
| C | -13.259543 | -4.509622 | -1.533822 |
| H | -11.543666 | -3.198583 | -1.395117 |
| C | -13.979736 | -5.623618 | 0.502262  |
| C | -11.154023 | -4.592262 | 4.978813  |
| H | -9.848961  | -3.247291 | 3.896908  |
| C | -12.930193 | -5.674677 | 3.721799  |
| C | -14.134330 | -5.378745 | -0.858611 |

|   |            |           |           |
|---|------------|-----------|-----------|
| H | -13.395007 | -4.336569 | -2.597649 |
| H | -14.653707 | -6.299987 | 1.020656  |
| C | -12.257294 | -5.461752 | 4.920939  |
| H | -10.647825 | -4.434783 | 5.926981  |
| H | -13.786982 | -6.341551 | 3.681478  |
| H | -14.936053 | -5.864029 | -1.407097 |
| H | -12.588048 | -5.967724 | 5.823000  |
| N | -10.880366 | 3.999008  | -1.239741 |
| N | -11.130638 | -3.609131 | 1.386884  |
| N | 11.130871  | -3.609034 | -1.386667 |

**Table S10.** Cartesian coordinates (Å) for the optimized ground-state structure of **4f**.

| Atom | x         | y         | z         |
|------|-----------|-----------|-----------|
| C    | -1.465914 | -0.209614 | -0.017502 |
| C    | -0.724407 | -1.439169 | -0.011617 |
| C    | -0.711932 | 0.942251  | -0.009505 |
| C    | 0.724922  | -1.439174 | 0.012383  |
| C    | 0.712455  | 0.942246  | 0.011095  |
| H    | -1.218998 | 1.902861  | -0.033893 |
| C    | 1.466433  | -0.209624 | 0.018679  |
| H    | 1.219524  | 1.902846  | 0.035809  |
| N    | -1.249625 | -2.670741 | -0.014722 |
| N    | 1.250140  | -2.670747 | 0.015072  |
| S    | 0.000257  | -3.713908 | -0.000002 |
| C    | 2.946662  | -0.176501 | 0.016484  |
| C    | 3.628066  | 0.740099  | -0.798554 |
| C    | 3.702444  | -1.031657 | 0.832615  |
| C    | 5.017914  | 0.802571  | -0.803888 |
| H    | 3.065594  | 1.385006  | -1.468144 |
| C    | 5.090952  | -0.956680 | 0.850303  |
| H    | 3.200848  | -1.747055 | 1.474551  |
| C    | 5.757371  | -0.043612 | 0.027317  |
| H    | 5.535349  | 1.490391  | -1.465649 |
| H    | 5.665563  | -1.600171 | 1.509444  |
| C    | -2.946143 | -0.176485 | -0.015366 |
| C    | -3.701879 | -1.031365 | -0.831829 |
| C    | -3.627591 | 0.739856  | 0.799925  |

|   |            |           |           |
|---|------------|-----------|-----------|
| C | -5.090384  | -0.956357 | -0.849598 |
| H | -3.200246  | -1.746563 | -1.473959 |
| C | -5.017439  | 0.802351  | 0.805174  |
| H | -3.065159  | 1.384534  | 1.469768  |
| C | -5.756850  | -0.043539 | -0.026370 |
| H | -5.664959  | -1.599622 | -1.508993 |
| H | -5.534914  | 1.489959  | 1.467124  |
| C | 8.033108   | -1.053948 | -0.210919 |
| C | 7.940853   | 1.155090  | 0.266658  |
| C | 7.740209   | -2.381590 | -0.533172 |
| C | 9.367873   | -0.599731 | -0.126469 |
| C | 9.308952   | 0.814000  | 0.180322  |
| C | 7.539324   | 2.454498  | 0.586843  |
| C | 8.804083   | -3.251552 | -0.735553 |
| H | 6.717071   | -2.734132 | -0.616431 |
| C | 10.424759  | -1.481046 | -0.363957 |
| C | 10.288762  | 1.780927  | 0.414670  |
| H | 6.490470   | 2.720513  | 0.671373  |
| C | 8.526969   | 3.411035  | 0.785503  |
| C | 10.143692  | -2.815220 | -0.656730 |
| H | 8.607008   | -4.292828 | -0.971579 |
| H | 11.454941  | -1.140854 | -0.317435 |
| C | 9.898129   | 3.087841  | 0.705355  |
| H | 11.343614  | 1.527681  | 0.366712  |
| H | 8.244148   | 4.432823  | 1.019585  |
| C | -7.940275  | 1.155287  | -0.265614 |
| C | -8.032643  | -1.053904 | 0.211230  |
| C | -7.538681  | 2.454794  | -0.585349 |
| C | -9.308386  | 0.814191  | -0.179604 |
| C | -9.367384  | -0.599652 | 0.126631  |
| C | -7.739835  | -2.381656 | 0.533112  |
| C | -8.526284  | 3.411401  | -0.783827 |
| H | -6.489809  | 2.720809  | -0.669667 |
| C | -10.288159 | 1.781231  | -0.413680 |
| C | -10.424344 | -1.481058 | 0.363447  |
| H | -6.716719  | -2.734228 | 0.616520  |
| C | -8.803769  | -3.251684 | 0.734892  |

|   |            |           |           |
|---|------------|-----------|-----------|
| C | -9.897463  | 3.088236  | -0.703846 |
| H | -8.243452  | 4.433267  | -1.017549 |
| H | -11.343014 | 1.527965  | -0.365895 |
| C | -10.143364 | -2.815356 | 0.655760  |
| H | -11.454503 | -1.140826 | 0.316727  |
| H | -8.606777  | -4.293056 | 0.970559  |
| N | -7.169805  | 0.016542  | -0.028549 |
| N | 7.170330   | 0.016426  | 0.029385  |
| N | -11.198274 | -3.742168 | 0.873439  |
| N | -10.871667 | 4.100358  | -0.917574 |
| N | 10.872527  | 4.099712  | 0.919348  |
| N | 11.198646  | -3.741839 | -0.875099 |
| C | -12.319501 | -3.738253 | 0.008754  |
| C | -12.145859 | -3.603244 | -1.376928 |
| C | -13.620416 | -3.859418 | 0.511192  |
| C | -13.247079 | -3.581952 | -2.225835 |
| H | -11.142907 | -3.509417 | -1.782720 |
| C | -14.713657 | -3.857605 | -0.354299 |
| H | -13.775607 | -3.959217 | 1.581273  |
| C | -14.553874 | -3.712947 | -1.735689 |
| H | -13.085055 | -3.473957 | -3.296345 |
| H | -15.713330 | -3.956363 | 0.062975  |
| C | -11.165800 | -4.587306 | 2.007802  |
| C | -10.667219 | -4.127630 | 3.232680  |
| C | -11.622847 | -5.911461 | 1.924755  |
| C | -10.621161 | -4.975587 | 4.338579  |
| H | -10.312267 | -3.104881 | 3.317411  |
| C | -11.590176 | -6.738772 | 3.042064  |
| H | -12.008262 | -6.285724 | 0.980988  |
| C | -11.083988 | -6.293087 | 4.271055  |
| H | -10.227097 | -4.592619 | 5.277366  |
| H | -11.953801 | -7.760301 | 2.951513  |
| C | -11.989737 | 4.185686  | -0.052816 |
| C | -11.827910 | 4.033436  | 1.332501  |
| C | -13.276336 | 4.412915  | -0.555066 |
| C | -12.927489 | 4.098815  | 2.181230  |
| H | -10.836039 | 3.857146  | 1.738033  |

|   |            |           |           |
|---|------------|-----------|-----------|
| C | -14.366511 | 4.497042  | 0.310329  |
| H | -13.422620 | 4.527046  | -1.624967 |
| C | -14.219295 | 4.336374  | 1.691294  |
| H | -12.775196 | 3.974580  | 3.251401  |
| H | -15.354878 | 4.676710  | -0.106798 |
| C | -10.770028 | 4.944081  | -2.048807 |
| C | -10.311751 | 4.449931  | -3.275868 |
| C | -11.115544 | 6.301397  | -1.959850 |
| C | -10.196039 | 5.296024  | -4.378312 |
| H | -10.042275 | 3.401801  | -3.365163 |
| C | -11.014841 | 7.127893  | -3.073549 |
| H | -11.467656 | 6.702285  | -1.013995 |
| C | -10.548416 | 6.646823  | -4.305074 |
| H | -9.835179  | 4.885726  | -5.318892 |
| H | -11.291957 | 8.175801  | -2.978341 |
| C | 12.319207  | -3.739608 | -0.009601 |
| C | 12.144913  | -3.604653 | 1.376011  |
| C | 13.620277  | -3.862539 | -0.511238 |
| C | 13.245643  | -3.585140 | 2.225600  |
| H | 11.141863  | -3.509488 | 1.781243  |
| C | 14.712980  | -3.862490 | 0.354925  |
| H | 13.775981  | -3.962295 | -1.581246 |
| C | 14.552553  | -3.717903 | 1.736249  |
| H | 13.083102  | -3.477150 | 3.296032  |
| H | 15.712768  | -3.962588 | -0.061753 |
| C | 11.165695  | -4.587371 | -2.009138 |
| C | 10.665686  | -4.128732 | -3.233625 |
| C | 11.620739  | -5.912345 | -1.924982 |
| C | 10.617035  | -4.978089 | -4.338568 |
| H | 10.309116  | -3.106559 | -3.318452 |
| C | 11.585485  | -6.740861 | -3.041093 |
| H | 12.004119  | -6.286792 | -0.980459 |
| C | 11.079735  | -6.295419 | -4.270552 |
| H | 10.220051  | -4.596316 | -5.276581 |
| H | 11.945601  | -7.763551 | -2.949304 |
| C | 11.989308  | 4.186843  | 0.053157  |
| C | 11.826252  | 4.034076  | -1.331959 |



|   |            |           |           |
|---|------------|-----------|-----------|
| C | 13.276062  | 4.416537  | 0.553933  |
| C | 12.924796  | 4.101333  | -2.181906 |
| H | 10.834282  | 3.855938  | -1.736431 |
| C | 14.365121  | 4.502516  | -0.312657 |
| H | 13.423284  | 4.531154  | 1.623652  |
| C | 14.216695  | 4.341322  | -1.693442 |
| H | 12.771541  | 3.976658  | -3.251888 |
| H | 15.353611  | 4.684089  | 0.103354  |
| C | 10.770143  | 4.944686  | 2.049564  |
| C | 10.310926  | 4.451838  | 3.276832  |
| C | 11.112973  | 6.302533  | 1.958679  |
| C | 10.192536  | 5.299499  | 4.377737  |
| H | 10.040509  | 3.404012  | 3.366825  |
| C | 11.009613  | 7.130692  | 3.070946  |
| H | 11.462801  | 6.703099  | 1.011841  |
| C | 10.544163  | 6.650477  | 4.303115  |
| H | 9.829345   | 4.890541  | 5.318000  |
| H | 11.282910  | 8.179425  | 2.973777  |
| C | -15.401379 | 4.405794  | 2.628802  |
| H | -15.245190 | 5.157021  | 3.411892  |
| H | -16.319769 | 4.667110  | 2.093862  |
| H | -15.568962 | 3.443999  | 3.128328  |
| C | -10.426864 | 7.564409  | -5.498590 |
| H | -9.679865  | 8.348107  | -5.323034 |
| H | -10.126114 | 7.013883  | -6.395504 |
| H | -11.378165 | 8.063871  | -5.716008 |
| C | 15.397668  | 4.412528  | -2.632217 |
| H | 15.238500  | 5.161818  | -3.416553 |
| H | 16.315792  | 4.677552  | -2.098646 |
| H | 15.567637  | 3.450298  | -3.130109 |
| C | 10.440158  | 7.564564  | 5.500947  |
| H | 9.937333   | 7.069684  | 6.337752  |
| H | 11.432130  | 7.878689  | 5.848024  |
| H | 9.875950   | 8.473328  | 5.261340  |
| C | 11.045208  | -7.211827 | -5.470634 |
| H | 12.057369  | -7.495054 | -5.783835 |
| H | 10.501535  | -8.137801 | -5.249321 |

|   |            |           |           |
|---|------------|-----------|-----------|
| H | 10.555001  | -6.732837 | -6.323976 |
| C | 15.736197  | -3.692739 | 2.674033  |
| H | 15.621182  | -4.425952 | 3.480803  |
| H | 16.667914  | -3.919654 | 2.146449  |
| H | 15.850464  | -2.707594 | 3.142411  |
| C | -11.030573 | -7.214181 | 5.466846  |
| H | -11.998929 | -7.696359 | 5.642834  |
| H | -10.290881 | -8.011093 | 5.321218  |
| H | -10.757062 | -6.670632 | 6.376693  |
| C | -15.738059 | -3.685899 | -2.672736 |
| H | -15.624574 | -4.419087 | -3.479746 |
| H | -16.669770 | -3.911621 | -2.144630 |
| H | -15.851221 | -2.700486 | -3.140816 |

**Table S11.** Cartesian coordinates (Å) for the optimized ground-state structure of **7**.

| Atom | x         | y         | z         |
|------|-----------|-----------|-----------|
| C    | -0.741529 | 2.381510  | -0.177355 |
| C    | -0.762705 | 0.003235  | -0.082034 |
| C    | 0.702434  | 2.364135  | -0.030533 |
| C    | 0.648122  | -0.013302 | 0.069429  |
| H    | -1.269394 | -0.957317 | -0.107796 |
| H    | 1.123793  | -0.984092 | 0.176130  |
| N    | -1.240234 | 3.618007  | -0.277561 |
| N    | 1.241443  | 3.587746  | -0.030918 |
| S    | 0.017674  | 4.647480  | -0.197122 |
| C    | 2.882405  | 1.084866  | 0.227420  |
| C    | 3.739080  | 2.072400  | 0.665899  |
| S    | 3.769330  | -0.361471 | -0.176931 |
| C    | 5.099918  | 1.667406  | 0.692962  |
| H    | 3.395663  | 3.055305  | 0.958739  |
| C    | 5.284365  | 0.378351  | 0.269177  |
| H    | 5.922141  | 2.298521  | 1.011440  |
| C    | -2.960978 | 1.153749  | -0.340362 |
| C    | -3.787138 | 2.136005  | -0.839366 |
| S    | -3.885241 | -0.247188 | 0.142975  |
| C    | -5.160124 | 1.767573  | -0.852906 |
| H    | -3.415669 | 3.090410  | -1.186456 |

|   |            |           |           |
|---|------------|-----------|-----------|
| C | -5.388131  | 0.513992  | -0.360582 |
| H | -5.963187  | 2.400134  | -1.212858 |
| C | 7.304725   | -0.165121 | -0.982544 |
| C | 7.034722   | -0.970934 | 1.298923  |
| C | 7.076709   | 0.833902  | -1.924090 |
| C | 8.380257   | -1.062359 | -1.156015 |
| C | 8.113337   | -1.858475 | 1.096992  |
| C | 6.544670   | -0.756861 | 2.583696  |
| C | 7.908030   | 0.958808  | -3.042598 |
| H | 6.236242   | 1.507344  | -1.795832 |
| C | 9.228808   | -0.899311 | -2.252062 |
| C | 8.701148   | -2.473739 | 2.203259  |
| H | 5.703642   | -0.087850 | 2.730211  |
| C | 7.114038   | -1.414250 | 3.679890  |
| C | 8.986545   | 0.100163  | -3.201288 |
| H | 7.704427   | 1.733792  | -3.774943 |
| H | 10.082639  | -1.555415 | -2.380126 |
| C | 8.195023   | -2.263694 | 3.491034  |
| H | 9.554903   | -3.128935 | 2.069846  |
| H | 6.707520   | -1.247217 | 4.672476  |
| H | 9.648714   | 0.195749  | -4.056369 |
| H | 8.656241   | -2.768133 | 4.334578  |
| C | -7.256402  | -0.168712 | 1.036068  |
| C | -6.987816  | -1.114137 | -1.195156 |
| C | -6.692113  | 0.420614  | 2.164195  |
| C | -8.516900  | -0.797270 | 1.133094  |
| C | -8.251557  | -1.730911 | -1.068225 |
| C | -6.160616  | -1.453548 | -2.262424 |
| C | -7.352634  | 0.380395  | 3.396837  |
| H | -5.739883  | 0.932592  | 2.083385  |
| C | -9.145537  | -0.868092 | 2.377472  |
| C | -8.619685  | -2.718161 | -1.983950 |
| H | -5.205233  | -0.955103 | -2.381112 |
| C | -6.559802  | -2.413509 | -3.198682 |
| C | -8.571699  | -0.272481 | 3.505926  |
| H | -6.898845  | 0.856806  | 4.260144  |
| H | -10.092600 | -1.386633 | 2.476975  |

|   |            |           |           |
|---|------------|-----------|-----------|
| C | -7.781979  | -3.053280 | -3.053260 |
| H | -9.567720  | -3.232647 | -1.873047 |
| H | -5.903223  | -2.653215 | -4.029173 |
| H | -9.087902  | -0.327002 | 4.459483  |
| H | -8.097965  | -3.812801 | -3.761759 |
| N | 6.476461   | -0.349398 | 0.153489  |
| N | -6.628868  | -0.128264 | -0.237771 |
| C | -1.503485  | 1.161166  | -0.202681 |
| C | 1.425359   | 1.126467  | 0.094223  |
| N | -9.104445  | -1.289628 | -0.043636 |
| N | 8.521090   | -2.107102 | -0.225420 |
| C | 9.448680   | -3.182391 | -0.495224 |
| H | 10.495929  | -2.919032 | -0.277152 |
| H | 9.172238   | -4.052357 | 0.105551  |
| H | 9.369340   | -3.467434 | -1.547181 |
| C | -10.489356 | -1.702938 | -0.035319 |
| H | -10.876567 | -1.677622 | -1.056892 |
| H | -10.639376 | -2.713700 | 0.375869  |
| H | -11.071343 | -0.992372 | 0.556784  |

**Table S12.** Cartesian coordinates (Å) for the optimized ground-state structure of **9**.

| Atom | x         | y         | z         |
|------|-----------|-----------|-----------|
| C    | 1.470108  | 0.028669  | -0.000771 |
| C    | 0.725797  | 1.257789  | -0.002739 |
| C    | 0.711723  | -1.121760 | -0.004132 |
| C    | -0.725797 | 1.257789  | 0.002741  |
| C    | -0.711723 | -1.121760 | 0.004133  |
| H    | 1.217393  | -2.083177 | -0.027470 |
| C    | -1.470108 | 0.028669  | 0.000772  |
| H    | -1.217392 | -2.083177 | 0.027471  |
| N    | 1.250392  | 2.490151  | 0.001240  |
| N    | -1.250392 | 2.490151  | -0.001239 |
| S    | 0.000000  | 3.534298  | 0.000001  |
| C    | -2.946859 | -0.007525 | -0.018262 |
| C    | -3.631616 | -0.957119 | -0.770739 |
| C    | -3.727004 | 0.875686  | 0.721033  |
| C    | -5.021593 | -1.051873 | -0.791473 |

|   |            |           |           |
|---|------------|-----------|-----------|
| H | -3.054290  | -1.634801 | -1.391370 |
| C | -5.118764  | 0.823288  | 0.735160  |
| H | -3.226720  | 1.633135  | 1.310888  |
| C | -5.797352  | -0.154801 | -0.024682 |
| C | -5.617950  | -2.130818 | -1.679413 |
| C | -5.824650  | 1.863921  | 1.587310  |
| N | -7.212562  | -0.229900 | -0.022221 |
| C | -7.134682  | -2.135138 | -1.584454 |
| C | -5.078763  | -3.513341 | -1.226080 |
| C | -5.205941  | -1.858484 | -3.150297 |
| C | -7.332327  | 1.687879  | 1.522611  |
| C | -5.361152  | 1.711099  | 3.060094  |
| C | -5.455121  | 3.275079  | 1.058420  |
| C | -7.971368  | 0.687094  | 0.757020  |
| C | -7.872032  | -1.225325 | -0.793780 |
| C | -7.807399  | -3.100542 | -2.337064 |
| H | -3.987451  | -3.556579 | -1.294839 |
| H | -5.364030  | -3.711251 | -0.187908 |
| H | -5.476007  | -4.320646 | -1.848461 |
| H | -5.608757  | -2.622083 | -3.822933 |
| H | -5.582363  | -0.883766 | -3.476510 |
| H | -4.117480  | -1.858899 | -3.264999 |
| C | -8.101095  | 2.581420  | 2.271936  |
| H | -5.614640  | 0.715306  | 3.437833  |
| H | -4.279417  | 1.846514  | 3.152379  |
| H | -5.839785  | 2.452680  | 3.706712  |
| H | -5.796307  | 3.394322  | 0.025096  |
| H | -5.919786  | 4.059698  | 1.663749  |
| H | -4.373156  | 3.435848  | 1.078061  |
| C | -9.381827  | 0.619379  | 0.783214  |
| C | -9.280851  | -1.328157 | -0.790174 |
| C | -9.187610  | -3.208160 | -2.335003 |
| H | -7.231560  | -3.790216 | -2.945310 |
| C | -9.483945  | 2.521078  | 2.300462  |
| H | -7.599973  | 3.349328  | 2.851865  |
| C | -10.103954 | 1.534320  | 1.553318  |
| C | -10.188881 | -0.411061 | 0.011635  |

|   |            |           |           |
|---|------------|-----------|-----------|
| C | -9.904420  | -2.316028 | -1.556104 |
| H | -9.691319  | -3.966992 | -2.925421 |
| H | -10.063323 | 3.224354  | 2.890311  |
| H | -11.187031 | 1.472033  | 1.568018  |
| C | -11.147134 | 0.325162  | -0.961973 |
| C | -11.007760 | -1.264569 | 1.015881  |
| H | -10.986929 | -2.387955 | -1.543031 |
| H | -10.575615 | 0.929561  | -1.673538 |
| H | -11.758784 | -0.382324 | -1.529901 |
| H | -11.830044 | 0.988595  | -0.422842 |
| H | -11.687428 | -0.641567 | 1.605323  |
| H | -11.614414 | -2.014080 | 0.498365  |
| H | -10.337802 | -1.786150 | 1.706839  |
| C | 2.946859   | -0.007525 | 0.018262  |
| C | 3.631617   | -0.957118 | 0.770739  |
| C | 3.727004   | 0.875686  | -0.721032 |
| C | 5.021593   | -1.051873 | 0.791474  |
| H | 3.054291   | -1.634800 | 1.391371  |
| C | 5.118764   | 0.823288  | -0.735160 |
| H | 3.226719   | 1.633135  | -1.310887 |
| C | 5.797352   | -0.154801 | 0.024682  |
| C | 5.617951   | -2.130818 | 1.679413  |
| C | 5.824650   | 1.863920  | -1.587311 |
| N | 7.212562   | -0.229900 | 0.022221  |
| C | 7.134683   | -2.135138 | 1.584454  |
| C | 5.078763   | -3.513340 | 1.226081  |
| C | 5.205941   | -1.858483 | 3.150298  |
| C | 7.332327   | 1.687879  | -1.522612 |
| C | 5.361151   | 1.711098  | -3.060095 |
| C | 5.455122   | 3.275078  | -1.058421 |
| C | 7.971368   | 0.687094  | -0.757020 |
| C | 7.872032   | -1.225324 | 0.793780  |
| C | 7.807400   | -3.100541 | 2.337065  |
| H | 3.987452   | -3.556579 | 1.294840  |
| H | 5.364030   | -3.711251 | 0.187909  |
| H | 5.476008   | -4.320645 | 1.848462  |
| H | 5.608757   | -2.622083 | 3.822933  |

|   |           |           |           |
|---|-----------|-----------|-----------|
| H | 5.582363  | -0.883765 | 3.476510  |
| H | 4.117481  | -1.858899 | 3.265000  |
| C | 8.101095  | 2.581418  | -2.271937 |
| H | 5.614639  | 0.715305  | -3.437833 |
| H | 4.279416  | 1.846513  | -3.152379 |
| H | 5.839784  | 2.452679  | -3.706713 |
| H | 5.796308  | 3.394322  | -0.025097 |
| H | 5.919786  | 4.059697  | -1.663750 |
| H | 4.373156  | 3.435848  | -1.078062 |
| C | 9.381827  | 0.619378  | -0.783215 |
| C | 9.280851  | -1.328157 | 0.790174  |
| C | 9.187611  | -3.208159 | 2.335004  |
| H | 7.231560  | -3.790215 | 2.945311  |
| C | 9.483945  | 2.521076  | -2.300465 |
| H | 7.599973  | 3.349327  | -2.851867 |
| C | 10.103954 | 1.534319  | -1.553320 |
| C | 10.188881 | -0.411061 | -0.011636 |
| C | 9.904420  | -2.316027 | 1.556104  |
| H | 9.691319  | -3.966990 | 2.925423  |
| H | 10.063322 | 3.224353  | -2.890314 |
| H | 11.187031 | 1.472033  | -1.568020 |
| C | 11.147134 | 0.325163  | 0.961972  |
| C | 11.007760 | -1.264569 | -1.015881 |
| H | 10.986929 | -2.387954 | 1.543032  |
| H | 10.575615 | 0.929563  | 1.673537  |
| H | 11.758784 | -0.382323 | 1.529900  |
| H | 11.830043 | 0.988596  | 0.422841  |
| H | 11.687429 | -0.641567 | -1.605323 |
| H | 11.614414 | -2.014080 | -0.498365 |
| H | 10.337803 | -1.786151 | -1.706839 |

---
